# Supplementary material for: Photophysics and photochemistry of carminic acid and related natural pigments
Source: Royal Society of Chemistry journal article supplement (doi:10.1039/d0cp01312a), 2020-01-01
Supplement: d0cp01312a1.pdf [file d0cp01312a1.pdf]

## SUPPLEMENTARY INFORMATION

### Photophysics and photochemistry of carminic acid and related natural pigments

*Margherita Zucchelli, <sup>a,b,†</sup> Fernando D. Villarruel, <sup>a,c,†</sup> Pedro David-Gara, <sup>d</sup> Mariana R. Costante, <sup>c</sup>  
Marcos Tascón, <sup>b,e</sup> Fernando Marte, <sup>b,\*</sup> Fernando S. García Einschlag, <sup>c,\*</sup> Franco M. Cabrerizo <sup>a,\*</sup>*

<sup>a</sup> Instituto Tecnológico de Chascomús (INTECH), Universidad Nacional de San Martín (UNSAM) - Consejo Nacional de Investigaciones Científicas y Técnicas (CONICET), Av. Intendente Marino Km 8.2, CC 164 (B7130IWA), Chascomús, Argentina. E-mail: [fcabrerizo@intech.gov.ar](mailto:fcabrerizo@intech.gov.ar)

<sup>b</sup> IIPC-Tarea, Universidad Nacional de San Martín, Quinquela Martín 1784, CABA, Argentina. E-mail: [fmarte.iipc@gmail.com](mailto:fmarte.iipc@gmail.com)

<sup>c</sup> INIFTA - CONICET, Universidad Nacional de La Plata, Diag. 113 y 64 (1900), La Plata, Argentina. E-mail: [fgarciae@quimica.unlp.edu.ar](mailto:fgarciae@quimica.unlp.edu.ar)

<sup>d</sup> Centro de Investigaciones Ópticas (CIOP – CONICET – CIC), Universidad Nacional de La Plata, C.C. 3, (1897) La Plata, Argentina.

<sup>e</sup> Instituto de Investigación e Ingeniería Ambiental (IIIA), CONICET-UNSAM, San Martín, Buenos Aires, Argentina.

\* To whom correspondence should be addressed ([fcabrerizo@intech.gov.ar](mailto:fcabrerizo@intech.gov.ar), [fgeins@inifta.unlp.edu.ar](mailto:fgeins@inifta.unlp.edu.ar) and [fmarte.iipc@gmail.com](mailto:fmarte.iipc@gmail.com))

† Both authors contributed equally

| <b>Contents:</b>                                                                                                                                           | <b><u>Page</u></b> |
|------------------------------------------------------------------------------------------------------------------------------------------------------------|--------------------|
| 1. UV-visible absorption spectra of air-equilibrated CA aqueous solution irradiated at 350 nm and 366 nm                                                   | <b>S3</b>          |
| 2. EEMs of CA irradiated aqueous solution (420 nm)                                                                                                         | <b>S4</b>          |
| 3. EEMs of CA irradiated aqueous solution (300 nm)                                                                                                         | <b>S5</b>          |
| 4. Difference UV-visible absorption and emission spectra of CA aqueous solution irradiated under air-equilibrated and N <sub>2</sub> -saturated conditions | <b>S6</b>          |
| 5. Hydrogen peroxide production upon CA photoexcitation                                                                                                    | <b>S7</b>          |
| 6. Effect of SOD on the photodegradation of CA                                                                                                             | <b>S8</b>          |
| 7. Effect of sodium azide (NaN <sub>3</sub> ) on the photodegradation of CA                                                                                | <b>S9</b>          |
| 8. Normalized Difference spectra of CA Lake air-equilibrated aqueous solution irradiated at 420 nm and 300 nm                                              | <b>S10</b>         |
| 9. EEMs of CA Lake irradiated aqueous solution (420 nm)                                                                                                    | <b>S11</b>         |
| 10. EEMs of CA Lake irradiated aqueous solution (300 nm)                                                                                                   | <b>S12</b>         |
| 11. Comparative analysis of CA, Lake and the photoproducts fluorescence emission spectra                                                                   | <b>S13</b>         |

1. UV-visible absorption spectra of air-equilibrated CA aqueous solution irradiated at 350 nm and 366 nm

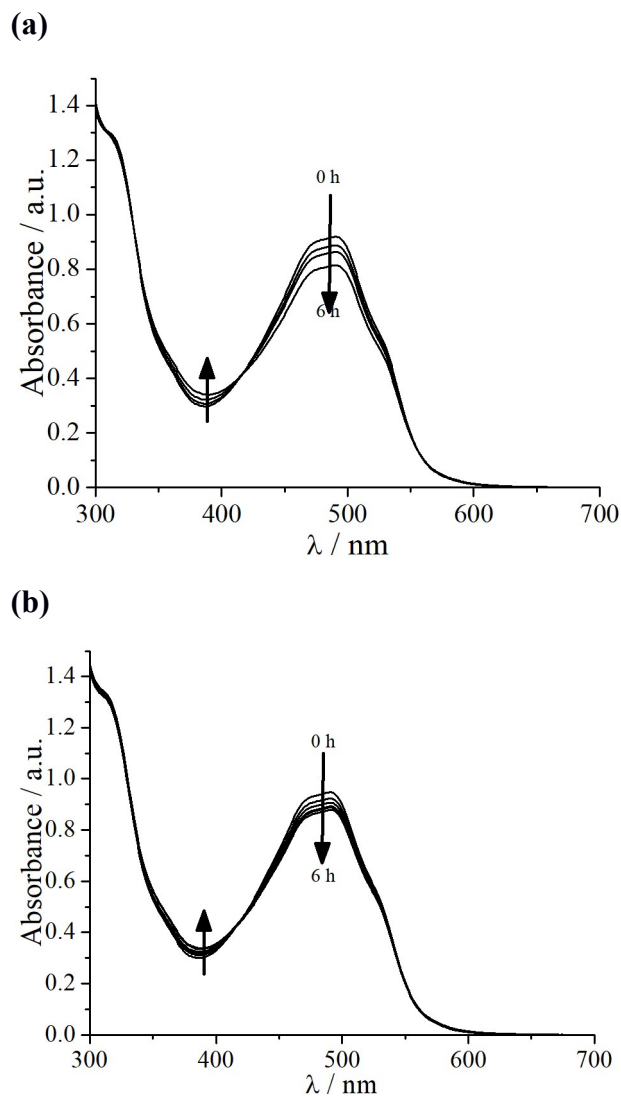

**Figure SI.1.** Evolution of the UV-visible absorption spectra of air-equilibrated CA aqueous solution ( $[CA]_0 = 340 \mu\text{M}$ ) when subject to irradiation: **(a)**  $h\nu = 350 \text{ nm}$ , and **(b)**  $h\nu = 366 \text{ nm}$ .

## 2. EEMs of CA irradiated aqueous solution (420 nm)

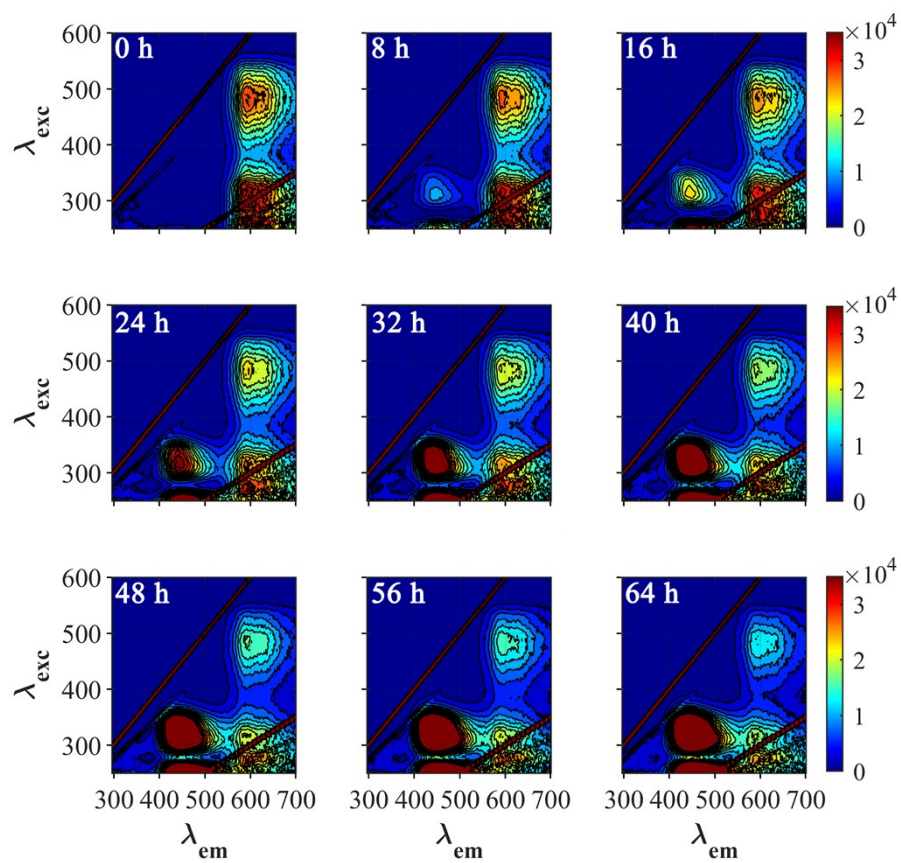

**Figure SI.2.** Evolution of EEMs of air-equilibrated CA aqueous solution ( $[CA]_0 = 110 \mu\text{M}$ ) when subject to irradiation ( $h\nu = 420 \text{ nm}$ ). Irradiation times are depicted as inset inside each EEM.

### 3. EEMs of CA irradiated aqueous solution (300 nm)

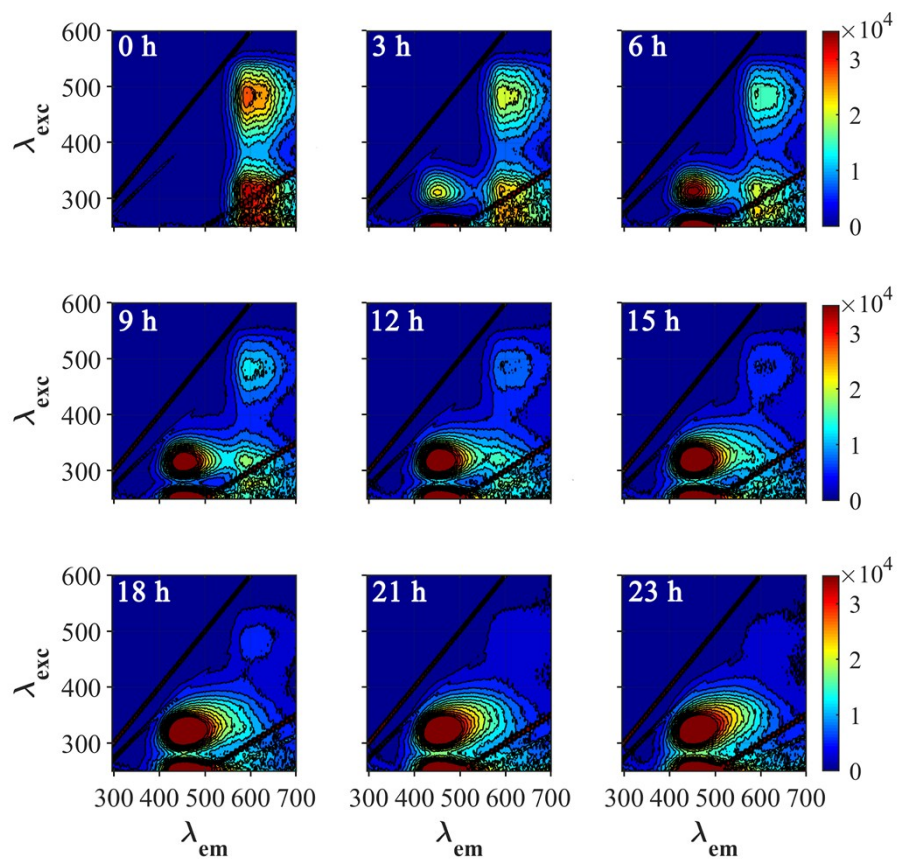

**Figure SI.3.** Evolution of EEMs of air-equilibrated CA aqueous solution ( $[CA]_0 = 110 \mu\text{M}$ ) when subject to irradiation ( $h\nu = 300 \text{ nm}$ ). Irradiation times are depicted as inset inside each EEM.

#### 4. Difference UV-visible absorption and emission spectra of CA aqueous solution irradiated under air-equilibrated and N<sub>2</sub>-saturated conditions

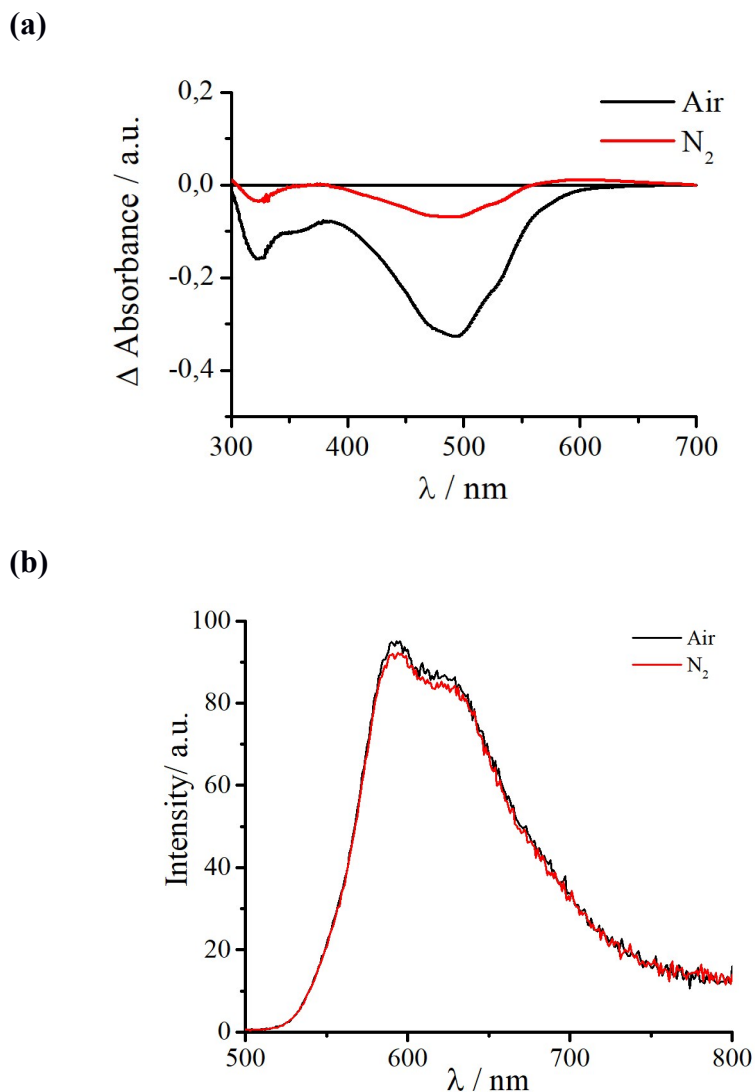

**Figure SI.4.** (a) Experimental difference (ED) absorption spectra of CA irradiated ( $h\nu = 420$  nm; Irradiation time = 24 h) under air-equilibrated (**black**) and N<sub>2</sub>-saturated (**red**) atmosphere. (b) Fluorescence emission spectra of CA recorded under air-equilibrated and N<sub>2</sub>-saturated solutions.

5. Hydrogen peroxide production upon CA photoexcitation

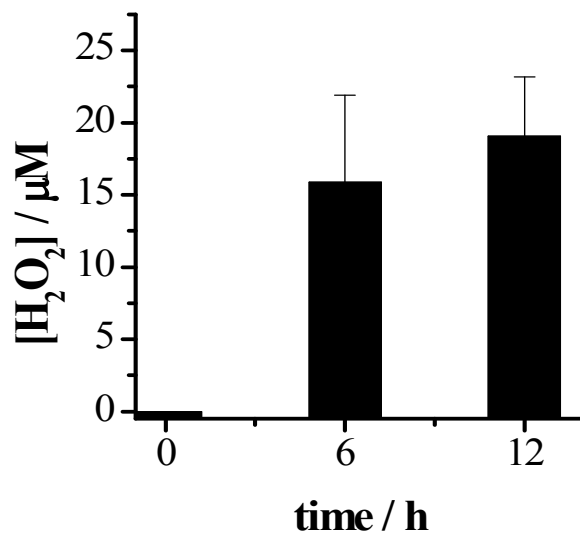

**Figure SI.5.** Generation of H<sub>2</sub>O<sub>2</sub> upon photoexcitation ( $h\nu = 420$  nm, irradiation times = 0, 6 and 12 h) of CA in air-equilibrated aqueous solution ( $[CA]_0 = 110$  μM).

## 6. Effect of SOD on the photodegradation of CA

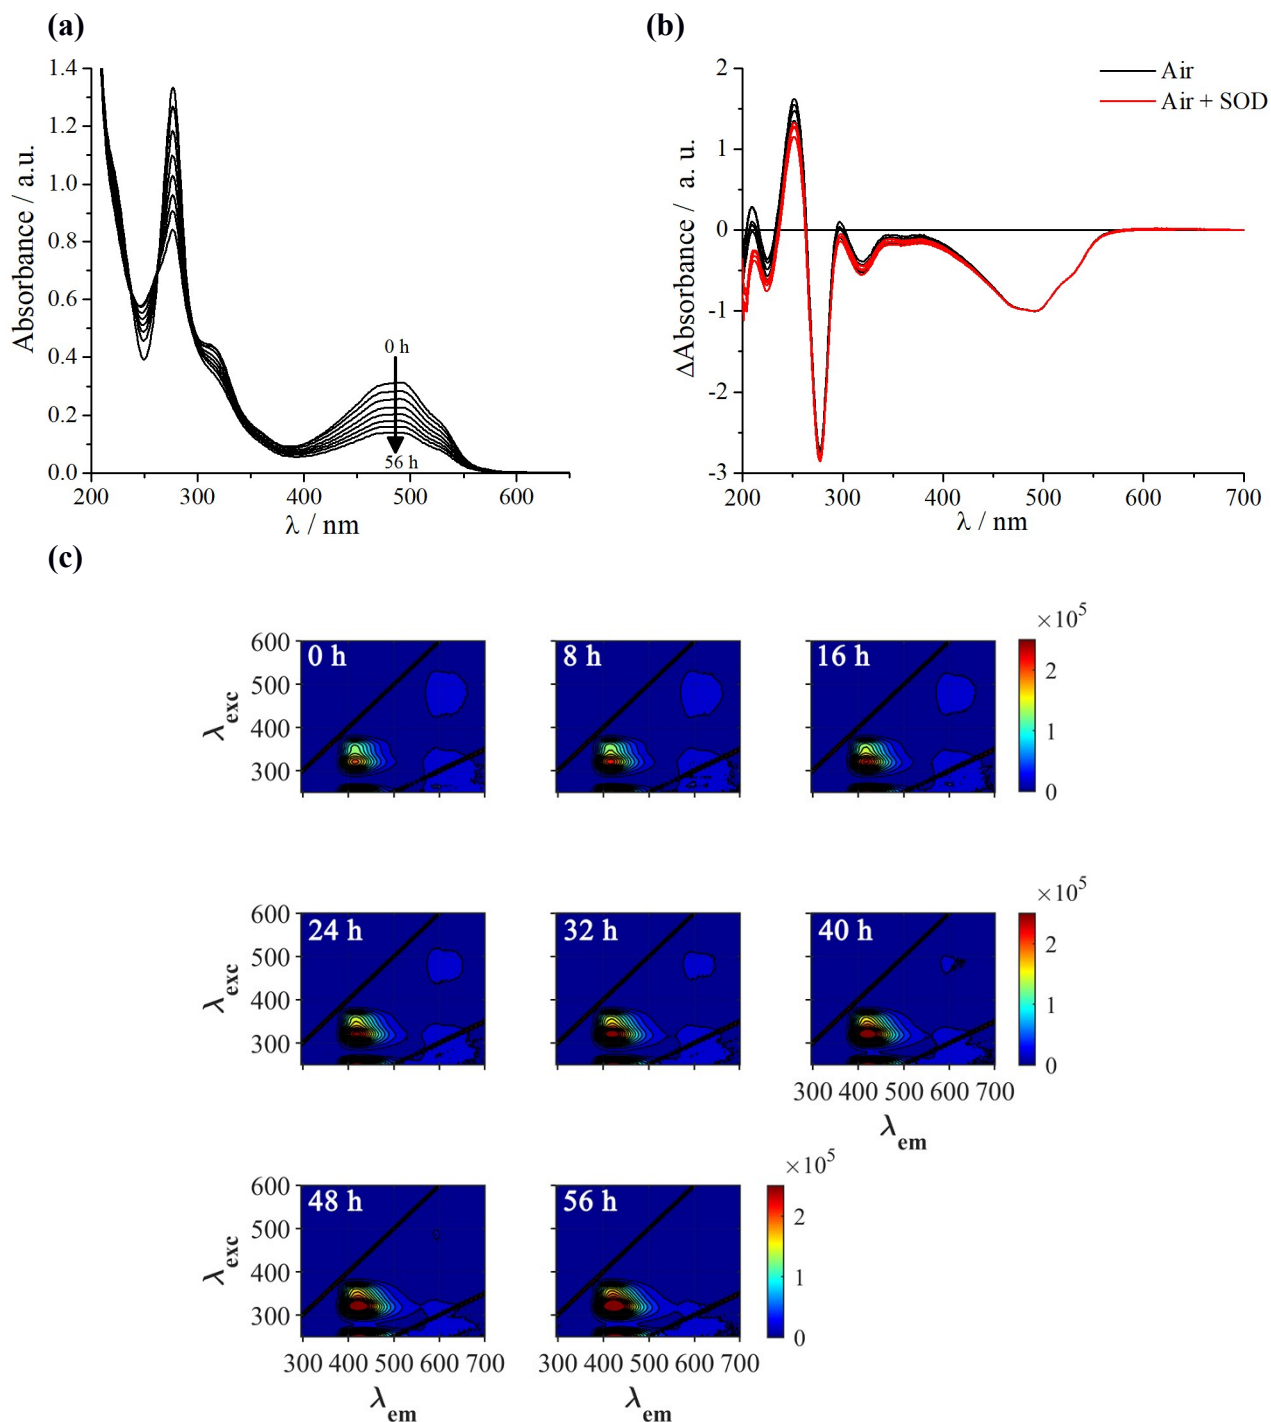

**Figure SI.6.** (a) UV-vis absorption and (b) Normalized Difference (ND) spectra of CA solution ( $[\text{CA}]_0 = 110 \mu\text{M}$ ) irradiated ( $h\nu = 420 \text{ nm}$ ) in the absence (red) and in the presence (black) of SOD (40 U/ml). (c) Evolution of EEMs of CA irradiated solutions. Irradiation times are depicted as inset inside each EEM.



## 7. Effect of sodium azide ( $\text{NaN}_3$ ) on the photodegradation of CA

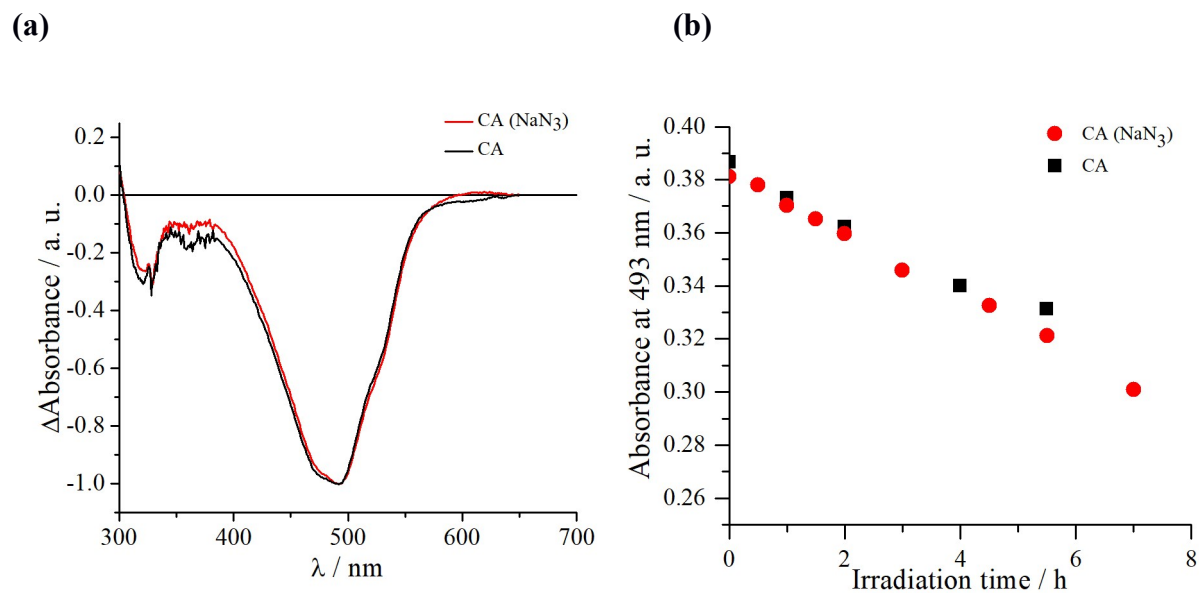

**Figure SI.7.** (a) Normalized Difference (ND) UV-vis absorption spectra of CA solution ( $[\text{CA}]_0 = 110 \mu\text{M}$ ) irradiated ( $h\nu = 420 \text{ nm}$ , irradiation time = 7 h) in the absence (**black**) and in the presence (**red**) of sodium azide ( $[\text{NaN}_3]_0 = 11 \text{ mM}$ ). (b) Evolution of absorbance at 495 nm as a function of the irradiation time.

**8. Normalized Difference spectra of CA Lake air-equilibrated aqueous solution irradiated at 300 nm and 420 nm**

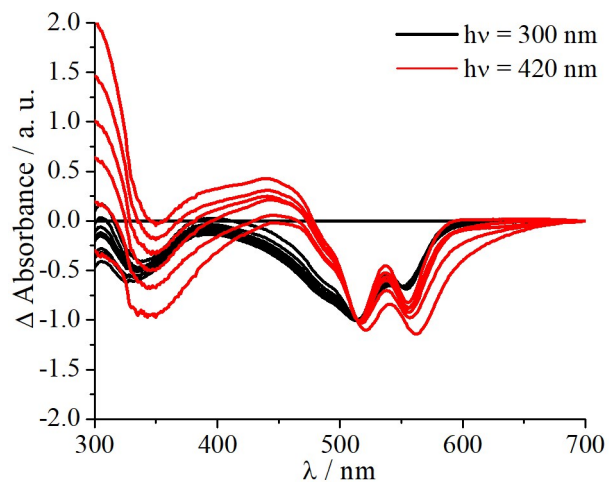

**Figure SI.8.** Normalized Difference (ND) absorption spectra of Lake aqueous solutions irradiated at  $h\nu = 420$  nm (**red**) and 300 nm (**black**). Total irradiation time = 24 h.

9. EEMs of CA Lake irradiated aqueous solution (420 nm)

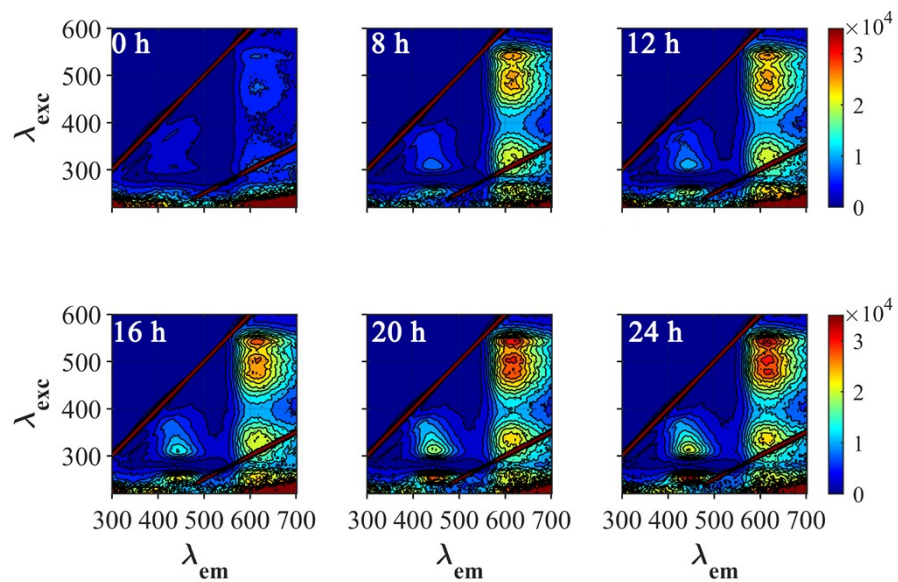

**Figure SI.9.** Evolution of EEMs of air-equilibrated Lake aqueous solution when subject to irradiation ( $h\nu = 420$  nm). Irradiation times are depicted as inset inside each EEM.

## 10. EEMs of CA Lake irradiated aqueous solution (300 nm)

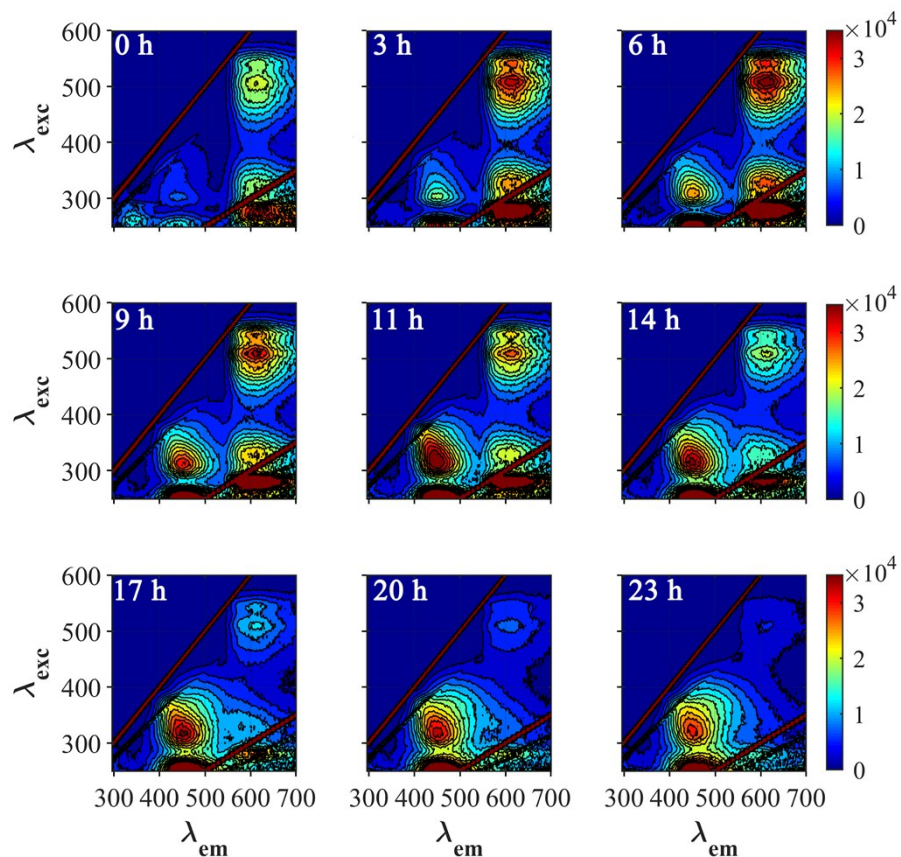

**Figure SI.10.** Evolution of EEMs of air-equilibrated Lake aqueous solution when subject to irradiation ( $h\nu = 300$  nm). Irradiation times are depicted as inset inside each EEM.

## 11. Comparative analysis of CA, Lake and the photoproducts fluorescence emission spectra

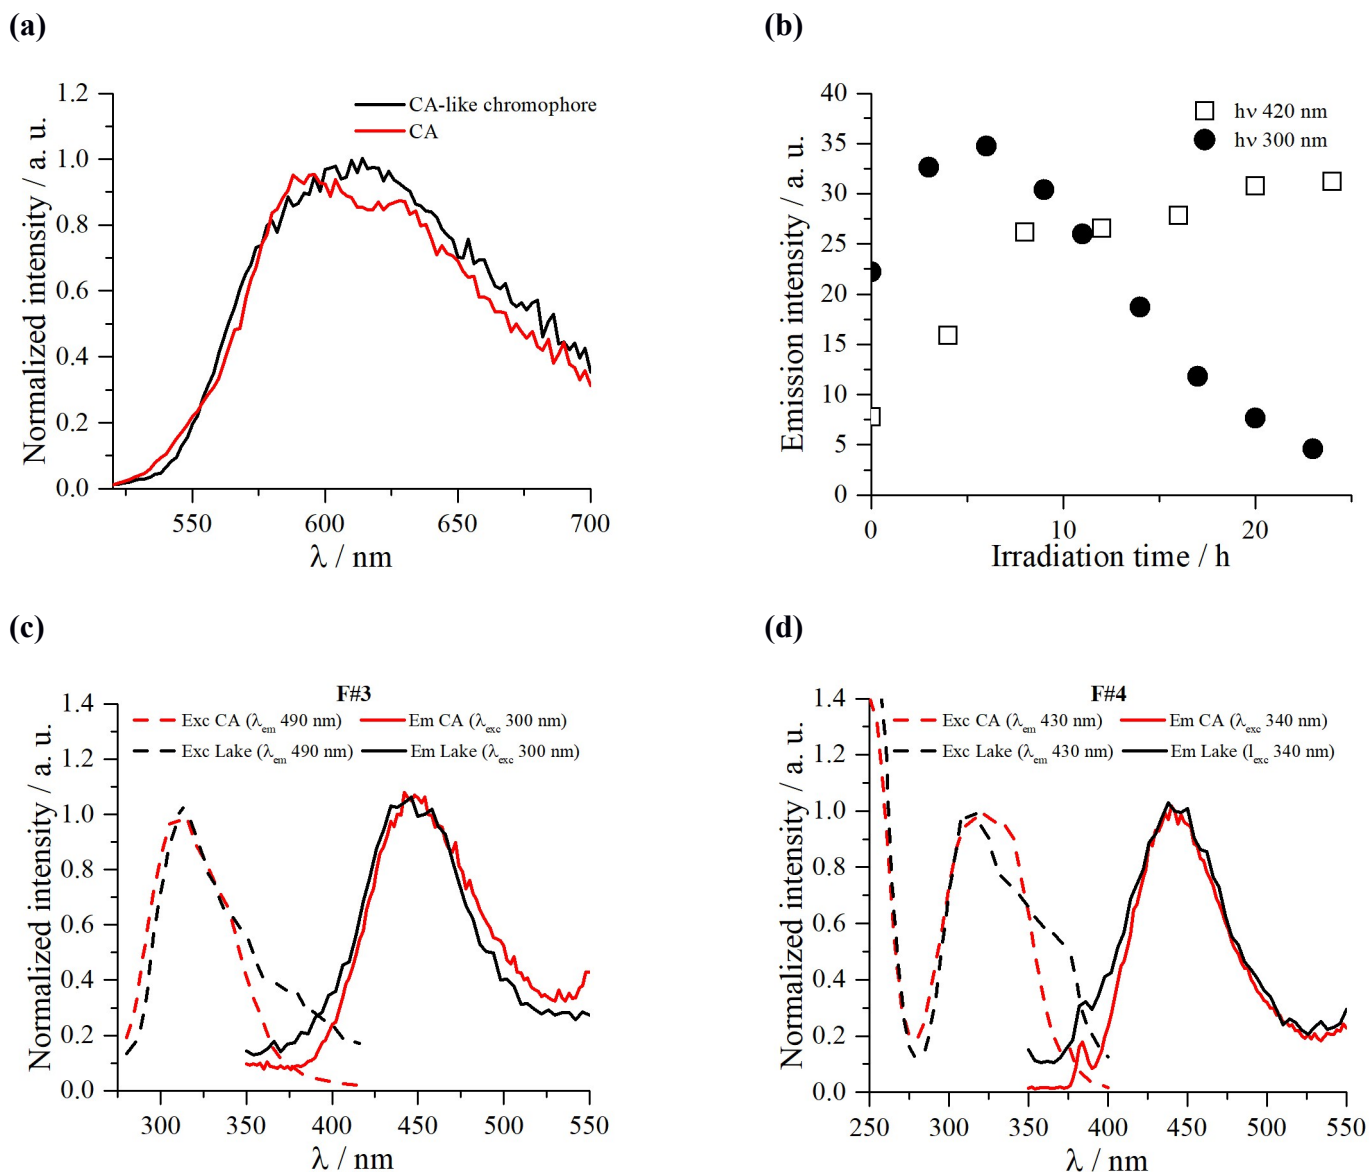

**Figure SI.11.** (a) Normalized fluorescence emission spectra of CA (red) and CA-like chromophore (black) produced upon irradiation ( $h\nu = 300$  nm) of Lake. (b) Evolution of the total emission intensity of CA-like chromophore (calculated as the integral below the entire emission spectra) as a function of the irradiation time ( $h\nu = 300$  and 420 nm). (c) and (d) Normalized excitation (dashed lines,  $\lambda_{em} = 495$  nm) and emission (solid lines,  $\lambda_{exc} = 340$  nm) spectra of photoproducts F#3 and F#4, respectively, obtained during the irradiation (24 h) of CA (red) and Lake (black).
